# Supplementary material for: Cell cycle entry triggers a switch between two modes of Cdc42 activation during yeast polarization
Source: eLife journal article supplement (doi:10.7554/elife.26722), 2017-07-06
Supplement: supp [file elife-26722-supp-v1.zip]

Archive with 34 entries (34 files):
- elife_poa_e26722_Figure_5_source_data_1.xlsx
- elife_poa_e26722_Figure_6_figure_supplement_1.pdf
- elife_poa_e26722_Figure_7_source_data_2.xlsx
- elife_poa_e26722_Figure_7_source_data_1.xlsx
- elife_poa_e26722_Figure_2_figure_supplement_2.pdf
- elife_poa_e26722_Figure_2_source_data_1.xlsx
- elife_poa_e26722_Figure_6_figure_supplement_2.pdf
- elife_poa_e26722_Figure_5_figure_supplement_1.pdf
- elife_poa_e26722_Figure_1_figure_supplement_5.pdf
- elife_poa_e26722_Figure_1_figure_supplement_4.pdf
- elife_poa_e26722_Figure_1_figure_supplement_3.pdf
- elife_poa_e26722_Figure_2_figure_supplement_1.pdf
- elife_poa_e26722_Figure_5_source_data_2.xlsx
- elife_poa_e26722_Figure_8_figure_supplement_1.pdf
- elife_poa_e26722_Figure_3_figure_supplement_1.pdf
- elife_poa_e26722_Video_2.avi
- elife_poa_e26722_Figure_5_figure_supplement_4.pdf
- elife_poa_e26722_Figure_4_source_data_1.xlsx
- elife_poa_e26722_Video_1.avi
- elife_poa_e26722_Figure_4_figure_supplement_1.pdf
- elife_poa_e26722_Supplementary_File_1.docx
- elife_poa_e26722_Figure_1_figure_supplement_1.pdf
- elife_poa_e26722_Figure_6_source_data_2.xlsx
- elife_poa_e26722_Figure_5_figure_supplement_2.pdf
- elife_poa_e26722_Video_3.avi
- elife_poa_e26722_Figure_3_source_data_1.xlsx
- elife_poa_e26722_Figure_5_figure_supplement_3.pdf
- elife_poa_e26722_Figure_8_source_data_1.xlsx
- elife_poa_e26722_Figure_1_figure_supplement_2.pdf
- elife_poa_e26722_Figure_9_source_data_1.xlsx
- elife_poa_e26722_Video_4.avi
- elife_poa_e26722_Supplementary_File_2.xlsx
- elife_poa_e26722_Figure_4_figure_supplement_2.pdf
- elife_poa_e26722_Figure_6_source_data_1.xlsx
