# Supplementary material for: Cell cycle entry triggers a switch between two modes of Cdc42 activation during yeast polarization
Source: eLife journal article supplement (doi:10.7554/elife.26722), 2017-07-06
Supplement: supp [file elife-26722-supp-v1.zip › elife_poa_e26722_Figure_1_figure_supplement_5.pdf]

A

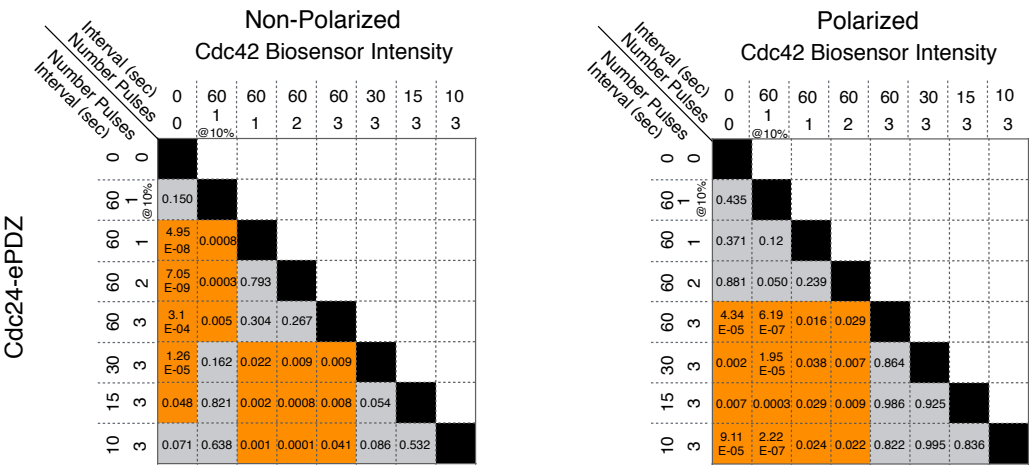

B

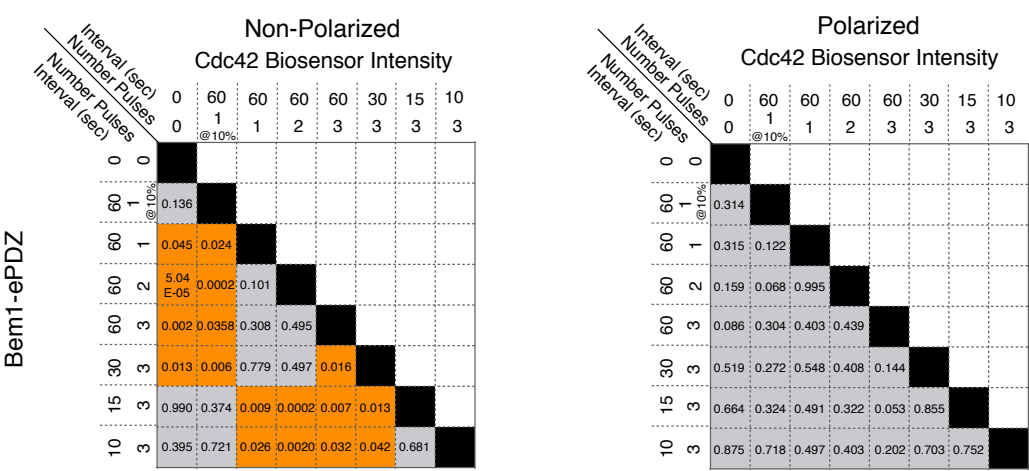

C

| Cdc42 Biosensor Intensity in Non-Polarized versus Polarized Cells |             |              |              |              |              |              |       |        |
|-------------------------------------------------------------------|-------------|--------------|--------------|--------------|--------------|--------------|-------|--------|
| Interval (sec)                                                    | 0           | 60           | 60           | 60           | 60           | 30           | 15    | 10     |
| Number Pulses                                                     | 0           | 1            | 1            | 2            | 3            | 3            | 3     | 3      |
| @10%                                                              |             |              |              |              |              |              |       |        |
| Cdc24-ePDZ                                                        | 5.7<br>E-08 | 1.04<br>E-06 | 7.26<br>E-09 | 2.78<br>E-06 | 8.11<br>E-05 | 1.01<br>E-06 | 0.059 | 0.0803 |
| Bem1-ePDZ                                                         | 0.013       | 1.41<br>E-05 | 0.012        | 1.47<br>E-08 | 0.003        | 0.002        | 0.008 | 0.009  |
