# Supplementary material for: Cell cycle entry triggers a switch between two modes of Cdc42 activation during yeast polarization
Source: eLife journal article supplement (doi:10.7554/elife.26722), 2017-07-06
Supplement: supp [file elife-26722-supp-v1.zip › elife_poa_e26722_Figure_2_source_data_1.xlsx]

## Sheet: Sheet1
	Cdc42Light	Cdc42Dark	Cdc24Light	Cdc24Dark	Bem1Light	Bem1Dark
Time of Appearance	-27	-26	-32	-27	-22	-19
	-17	-20	-23	-25	-19	-18
	-16	-19	-22	-22	-18	-15
	-15	-18	-22	-21	-16	-15
	-15	-17	-21	-21	-16	-14
	-15	-16	-19	-18	-14	-14
	-15	-16	-18	-17	-14	-14
	-15	-16	-18	-17	-14	-13
	-15	-15	-17	-17	-14	-13
	-14	-14	-17	-16	-12	-12
	-14	-14	-17	-16	-12	-12
	-14	-14	-16	-15	-12	-12
	-14	-14	-16	-14	-12	-10
	-13	-13	-15	-14	-11	-10
	-13	-13	-15	-14	-11	-9
	-12	-13	-15	-14	-11	-9
	-12	-13	-15	-13	-11	-8
	-12	-13	-15	-13	-10	-7
	-11	-13	-15	-13	-9	-7
	-11	-12	-14	-13	-9	-6
	-11	-12	-14	-12	-9	-5
	-10	-12	-14	-12	-9	-3
	-10	-12	-14	-12	-9
	-9	-11	-13	-12	-9
	-9	-11	-13	-12	-9
	-9	-11	-13	-11	-8
	-8	-10	-12	-11	-8
	-8	-10	-12	-11	-8
	-7	-9	-12	-11	-8
	-7	-9	-12	-11	-8
	-6	-7	-11	-11	-8
		-7	-11	-11	-8
		-7	-11	-10	-7
			-11	-9	-7
			-10	-8	-6
			-10	-7	-6
			-9	-7	-5
			-9		-4
					-4
