# Supplementary material for: Cell cycle entry triggers a switch between two modes of Cdc42 activation during yeast polarization
Source: eLife journal article supplement (doi:10.7554/elife.26722), 2017-07-06
Supplement: supp [file elife-26722-supp-v1.zip › elife_poa_e26722_Figure_3_source_data_1.xlsx]

## Sheet: Sheet1
	Cdc42Light	Cdc42Dark	Bem1Light	Bem1Dark
Time of Appearance	-46	-28	-19	-21
	-40	-24	-18	-18
	-40	-21	-18	-18
	-39	-20	-16	-17
	-36	-17	-15	-17
	-31	-16	-15	-16
	-31	-16	-15	-16
	-30	-16	-15	-16
	-30	-16	-15	-16
	-29	-15	-14	-15
	-29	-15	-14	-15
	-29	-15	-13	-15
	-28	-14	-13	-15
	-28	-14	-13	-15
	-27	-14	-13	-14
	-27	-14	-13	-14
	-27	-13	-12	-14
	-27	-13	-12	-13
	-26	-12	-11	-12
	-26	-12	-9	-12
	-26	-11	-9	-12
	-25	-11	-8	-12
	-25	-11	-8	-12
	-25	-11	-7	-11
	-25	-10		-11
	-23	-10		-11
	-18	-9		-11
	-16	-9		-11
	-16	-9		-11
	-14	-9		-11
	-14	-8		-10
	-13	-7		-10
	-11	-6		-10
		-5		-10
				-10
				-10
				-10
				-9
				-9
				-8
				-8
				-7
				-7
				-7
				-7
				-6
				-4
