# Supplementary material for: Cell cycle entry triggers a switch between two modes of Cdc42 activation during yeast polarization
Source: eLife journal article supplement (doi:10.7554/elife.26722), 2017-07-06
Supplement: supp [file elife-26722-supp-v1.zip › elife_poa_e26722_Figure_4_source_data_1.xlsx]

## Sheet: 42_24
		Early G1			24/42					42/24				G1/S			24/42						42/24
		Cell	24	42	Percent	Ave	SEM	42	24	Percent	Ave	SEM		Cell	24	42	Percent	Ave	SEM		42	24	Percent	Ave	SEM
		1	1	0	0	0.574667	0.0519626	2	0	0	0.448619	0.0489856		1	3	1	0.333333	0.533333	0.0759064		3	1	0.333333	0.444444	0.0728893
		2	3	1	0.333333			1	1	1				2	5	2	0.4				3	2	0.666667
		3	3	1	0.333333	0.5		1	1	1	0.428571			3	3	1	0.333333	0.45			1	1	1	0.366667
		4	1	1	1	0.259813		2	1	0.5	0.244928			4	4	3	0.75	0.262948			4	3	0.75	0.252496
		5	4	1	0.25			7	3	0.428571				5	2	1	0.5				2	1	0.5
		6	4	4	1			5	4	0.8				6	4	1	0.25				5	1	0.2
		7	4	3	0.75			5	3	0.6				7	3	1	0.333333				3	1	0.333333
		8	4	3	0.75			6	3	0.5				8	1	1	1				4	1	0.25
		9	5	4	0.8			7	4	0.571429				9	3	2	0.666667				5	1	0.2
		10	3	1	0.333333			4	1	0.25				10	1	1	1				5	1	0.2
		11	4	3	0.75			7	3	0.428571				11	4	2	0.5				5	2	0.4
		12	5	3	0.6			7	3	0.428571				12	3	1	0.333333				2	1	0.5
		13	2	1	0.5			6	1	0.166667
		14	3	2	0.666667			6	2	0.333333					36	17					42	16
		15	4	2	0.5			6	2	0.333333
		16	4	3	0.75			8	3	0.375														Early G1		G1/S
		17	4	2	0.5			5	2	0.4														Ave	SEM	Ave	SEM
		18	6	2	0.333333			8	2	0.25					Early G1								42_24	0.574667	0.0519626	0.444444	0.0728893		57.4667	5.19626	44.4444	7.28893
		19	3	3	1			5	3	0.6						42_24	24_42	24_Bem1	Bem1_24	42_Bem1	Bem1_42		24_42	0.448619	0.0489856	0.533333	0.0759064		44.8619	4.89856	53.3333	7.59064
		20	3	1	0.333333			5	1	0.2					Ave	0.574667	0.448619	0.331381	0.268746	0.312381	0.372762		24_Bem1	0.331381	0.0310877	0.645	0.0952596		33.1381	3.10877	64.5	9.52596
		21	3	1	0.333333			5	1	0.2					SEM	0.0519626	0.0489856	0.0310877	0.0282845	0.0214666	0.0245796		Bem1_24	0.268746	0.0282845	0.743333	0.0834148		26.8746	2.82845	74.3333	8.34148
		22	2	1	0.5			4	1	0.25													42_Bem1	0.312381	0.0214666	0.688492	0.0591872		31.2381	2.14666	68.8492	5.91872
		23	4	3	0.75			5	3	0.6					G1/S								Bem1_42	0.372762	0.0245796	0.879167	0.0478549		37.2762	2.45796	87.9167	4.78549
		24	5	4	0.8			6	4	0.666667					Ave	0.444444	0.533333	0.645	0.743333	0.688492	0.879167
		25	4	2	0.5			6	2	0.333333					SEM	0.0728893	0.0759064	0.0952596	0.0834148	0.0591872	0.0478549
			88	52				129	52

## Sheet: Bem1_24
		Early G1													G1/S
		Cell	Bem1	24	Percent	Ave	SEM		24	Bem1	Percent	Ave	SEM		Cell	Bem1	24	Percent	Ave	SEM		24	Bem1	Percent	Ave	SEM
		1	4	2	0.5	0.268746	0.0282845		4	2	0.5	0.331381	0.0310877		1	2	2	1	0.743333	0.0834148		2	2	1	0.645	0.0952596
		2	6	1	0.166667				5	1	0.2				2	3	1	0.333333				3	1	0.333333
		3	4	2	0.5	0.222222			5	2	0.4	0.333333			3	3	3	1	0.75			5	3	0.6	0.633333
		4	4	2	0.5	0.141422			4	2	0.5	0.155438			4	3	1	0.333333	0.263781			3	1	0.333333	0.301237
		5	5	2	0.4				4	2	0.5				5	4	3	0.75				4	3	0.75
		6	5	2	0.4				4	2	0.5				6	3	3	1				3	3	1
		7	3	0	0				6	0	0				7	3	2	0.666667				3	2	0.666667
		8	6	1	0.166667				4	1	0.25				8	1	1	1				6	1	0.166667
		9	5	1	0.2				4	1	0.25				9	5	3	0.6				5	3	0.6
		10	6	2	0.333333				3	2	0.666667				10	4	3	0.75				3	3	1
		11	3	1	0.333333				3	1	0.333333
		12	5	1	0.2				3	1	0.333333					31	22					37	22
		13	7	1	0.142857				3	1	0.333333
		14	5	1	0.2				4	1	0.25
		15	8	1	0.125				7	1	0.142857
		16	8	1	0.125				8	1	0.125
		17	7	3	0.428571				6	3	0.5
		18	4	2	0.5				4	2	0.5
		19	5	1	0.2				5	1	0.2
		20	8	2	0.25				5	2	0.4
		21	8	1	0.125				6	1	0.166667
		22	4	1	0.25				3	1	0.333333
		23	5	1	0.2				4	1	0.25
		24	9	2	0.222222				5	2	0.4
		25	4	1	0.25				4	1	0.25
			138	35					113	35

## Sheet: Bem1_42
		Early G1												G1/S
		Cell	Bem1	42	Percent	Ave	SEM	42	Bem1	Percent	Ave	SEM		Cell	Bem1	42	Percent	Ave	SEM		42	Bem1	Percent	Ave	SEM
		1	5	2	0.4	0.372762	0.0245796	8	2	0.25	0.312381	0.0214666		1	3	3	1	0.879167	0.0478549		6	3	0.5	0.688492	0.0591872
		2	8	2	0.25			6	2	0.333333				2	2	2	1				5	2	0.4
		3	6	3	0.5	0.4	0.122898	6	3	0.5	0.285714	0.107333		3	5	4	0.8	1	0.165774		7	4	0.571429	0.675	0.205031
		4	4	1	0.25			8	1	0.125				4	6	6	1				7	6	0.857143
		5	5	2	0.4			5	2	0.4				5	4	3	0.75				4	3	0.75
		6	5	2	0.4			6	2	0.333333				6	3	3	1				4	3	0.75
		7	5	2	0.4			7	2	0.285714				7	5	5	1				6	5	0.833333
		8	7	4	0.571429			7	4	0.571429				8	4	3	0.75				3	3	1
		9	5	2	0.4			5	2	0.4				9	4	3	0.75				5	3	0.6
		10	6	2	0.333333			7	2	0.285714				10	1	1	1				1	1	1
		11	4	1	0.25			5	1	0.2				11	1	1	1				2	1	0.5
		12	5	1	0.2			5	1	0.2				12	2	1	0.5				2	1	0.5
		13	5	3	0.6			8	3	0.375
		14	5	1	0.2			5	1	0.2					40	35					52	35
		15	7	3	0.428571			7	3	0.428571
		16	6	2	0.333333			5	2	0.4
		17	7	2	0.285714			7	2	0.285714
		18	4	1	0.25			5	1	0.2
		19	4	2	0.5			7	2	0.285714
		20	5	3	0.6			7	3	0.428571
		21	4	2	0.5			6	2	0.333333
		22	3	1	0.333333			6	1	0.166667
		23	5	2	0.4			7	2	0.285714
		24	5	1	0.2			4	1	0.25
		25	6	2	0.333333			7	2	0.285714
			131	49				156	49
