# Supplementary material for: Cell cycle entry triggers a switch between two modes of Cdc42 activation during yeast polarization
Source: eLife journal article supplement (doi:10.7554/elife.26722), 2017-07-06
Supplement: supp [file elife-26722-supp-v1.zip › elife_poa_e26722_Figure_5_source_data_1.xlsx]

## Sheet: Sheet1
	Cdc42 Light	Whi5 Light	Cdc42Dark	Whi5Dark		Bem1 Light	Whi5 Light	Bem1 Dark	Whi5Dark
Time of Appearance	-48	-34	-21	-33		-16	-24	-10	-22
	-44	-33	-19	-29		-18	-13	-11	-29
	-40	-29	-16	-26		-17	-23	-12	-28
	-37	-26	-16	-26		-7	-27	-16	-23
	-35	-26	-16	-24		-13	-30	-10	-14
	-34	-24	-16	-23		-17	-25	-10	-14
	-33	-23	-16	-23		-16	-26	-9	-12
	-33	-22	-16	-22		-11	-13	-10	-19
	-30	-21	-15	-22		-19	-23	-15	-21
	-29	-21	-15	-22		-11	-17	-15	-28
	-29	-21	-14	-21		-12	-14	-13	-24
	-29	-21	-14	-20		-15	-16	-15	-40
	-28	-21	-13	-20		-9	-11	-15	-23
	-26	-20	-12	-19		-19	-28	-12	-18
	-25	-20	-12	-18		-12	-28	-13	-19
	-25	-19	-11	-17		-11	-24	-15	-25
	-25	-18	-11	-17		-11	-21	-13	-20
	-23	-18	-11	-17		-14	-28	-17	-21
	-23	-17	-11	-17		-13	-14	-10	-21
	-20	-17	-9	-17		-15	-22	-7	-34
	-19	-17	-9	-16		-10	-18	-10	-19
	-18	-17	-9	-15		-9	-19	-14	-30
	-17	-16	-9	-14		-18	-23	-11	-30
	-16	-16	-9	-13		-13	-17	-10	-39
	-16	-16	-8	-12		-14	-23	-9	-27
	-15	-16	-8	-12		-13	-16	-7	-23
	-14	-15	-7	-12		-17	-18	-10	-24
	-11	-13	-5	-10		-8	-20	-15	-24
						-16	-26	-10	-17
						-10	-17	-9	-21
						-11	-21	-10	-33
						-8	-27	-7	-16
						-8	-25	-15	-27
						-9	-15	-10	-20
						-16	-26	-10	-26
								-14	-26
								-10	-18
								-17	-29
								-13	-13
								-15	-20
								-12	-26
								-8	-8
								-11	-23
								-13	-28
								-10	-23
