# Supplementary material for: Cell cycle entry triggers a switch between two modes of Cdc42 activation during yeast polarization
Source: eLife journal article supplement (doi:10.7554/elife.26722), 2017-07-06
Supplement: supp [file elife-26722-supp-v1.zip › elife_poa_e26722_Figure_5_source_data_2.xlsx]

## Sheet: Sheet1
	Cdc42_DMSO	Cdc42_1NMPP1	Bem1_DMSO			Cdc42 DMSO	Bem1 DMSO BE
Time of Appearance	2	2	8		Time of Bud Emergence	14	19
	3	2	10			15	21
	3	2	11			18	24
	3	2	12			20	28
	3	3	15			22	29
	3	3	18			23	29
	3	3	19			23	29
	4	3	20			26	29
	4	3	21			28	33
	6	4	22			32	35
	6	4	23			36	37
	7	4	28			43	40
	9	5	30			47	42
	10	5	31			48	44
	11	5	33			51	44
	15	6	33			52	44
	18	6	33			53	46
	26	6	37			54	47
	26	6	39			56	47
	28	8	39			64	51
	30	8	41			66	51
	31	8	42			67	51
	33	9	43			68	52
	36	10	44			72	57
	44	12	45			72	59
	50	12	46			74	61
		14	50				62
		15	58				69
		16	61				70
		16
		18
		20
		21
		22
		22
		28
		32
		32
		34
		44
