# Supplementary material for: Cell cycle entry triggers a switch between two modes of Cdc42 activation during yeast polarization
Source: eLife journal article supplement (doi:10.7554/elife.26722), 2017-07-06
Supplement: supp [file elife-26722-supp-v1.zip › elife_poa_e26722_Figure_6_source_data_1.xlsx]

## Sheet: Sheet1
	Cdc24Light	Cdc24Dark
Time of Appearance	-48	-28
	-48	-24
	-44	-23
	-44	-23
	-41	-22
	-38	-22
	-38	-20
	-37	-20
	-36	-18
	-32	-17
	-32	-16
	-31	-16
	-30	-16
	-29	-16
	-28	-15
	-28	-15
	-25	-15
	-24	-14
	-23	-14
	-23	-13
	-22	-13
	-21	-13
	-20	-12
	-19	-12
	-18	-12
	-15	-12
	-14	-12
	-14	-12
	-13	-11
	-11	-11
	-11	-11
	-9	-10
	-2	-9
		-9
		-8
