# Supplementary material for: Cell cycle entry triggers a switch between two modes of Cdc42 activation during yeast polarization
Source: eLife journal article supplement (doi:10.7554/elife.26722), 2017-07-06
Supplement: supp [file elife-26722-supp-v1.zip › elife_poa_e26722_Figure_6_source_data_2.xlsx]

## Sheet: Sheet1
	Time of Target Removal	Cdc24 Maintenance
	-40	5		1 = Cdc24 Maintained and Buds on Target
	-40	1		5 = Cdc24 Maintained and Buds off Target
	-40	5		0 = Cdc24 Not Maintained
	-36	5
	-35	5
	-34	1
	-33	1
	-32	1
	-32	5
	-31	1
	-31	5
	-30	1
	-29	1
	-29	1
	-29	1
	-28	5
	-28	0
	-27	5
	-26	5
	-25	5
	-23	1
	-20	1
	-19	1
	-18	1
	-16	1
	-16	1
	-15	5
	-13	1
	-11	1
	-9	1
	-7	1
	-6	1
	-5	1
	-5	1
	-4	1
	-4	1
