# Supplementary material for: Cell cycle entry triggers a switch between two modes of Cdc42 activation during yeast polarization
Source: eLife journal article supplement (doi:10.7554/elife.26722), 2017-07-06
Supplement: supp [file elife-26722-supp-v1.zip › elife_poa_e26722_Figure_7_source_data_1.xlsx]

## Sheet: Sheet1
	Time of:
	Outcompeted	Not Outcompeted		N Cells = 27
	-39	-20			Total Events
	-39	-18		45 to 41	0
	-38	-18		40 to 36	7
	-38	-18		35 to 31	8
	-38	-17		30 to 26	12
	-38	-16		25 to 21	12
	-37	-15		20 to 16	12
	-35	-15		15 to 11	14
	-35	-15		10 to 6	7
	-35	-14		5 to 1	6
	-34	-14		0	0
	-34	-14
	-34	-13		Total # Events	78
	-32	-11
	-31	-10
	-30	-9
	-29	-8
	-29	-7
	-29	-7
	-29	-6
	-28	-5
	-28	-5
	-28	-5
	-28	-5
	-26	-2
	-26	-1
	-26	-1
	-25
	-25
	-25
	-25
	-25
	-24
	-24
	-23
	-23
	-23
	-22
	-21
	-20
	-20
	-18
	-17
	-17
	-16
	-15
	-14
	-13
	-13
	-11
	-11
	-9
	-8
