# Supplementary material for: Cell cycle entry triggers a switch between two modes of Cdc42 activation during yeast polarization
Source: eLife journal article supplement (doi:10.7554/elife.26722), 2017-07-06
Supplement: supp [file elife-26722-supp-v1.zip › elife_poa_e26722_Figure_7_source_data_2.xlsx]

## Sheet: Sheet1
	Vehicle						1NMPP1
				N Cells = 27							N Cells = 24
	Relative to BE				Total Events			Relative to Gic2 App				Total Events
	Time of:			50 to 46	1			Time of:			0	0
	Outcompeted	Not Outcompeted		45 to 41	0			Outcompeted	Not Outcompeted		1 to 5	3
	-47	-19		40 to 36	5			4	3		6 to 10	20
	-40	-16		35 to 31	2			4	12		11 to 15	4
	-39	-16		30 to 26	9			6	15		16 to 20	19
	-37	-15		25 to 21	9			6	16		21 to 25	3
	-37	-15		20 to 16	13			6	17		26 to 30	17
	-37	-15		15 to 11	11			7	18		31 to 35	4
	-34	-15		10 to 6	10			7	19		36 to 40	17
	-33	-14		5 to 1	3			7	20		41 to 45	4
	-30	-14		0	1			7	24		46 to 50	18
	-29	-12			64			7	27		51 to 55	3
	-29	-10						7	27		56 to 60	18
	-29	-10						8	28		61 to 65	3
	-29	-9						8	29		66 to 70	16
	-28	-9						8	35		71 to 75	2
	-28	-9						8	38		76 to 80	11
	-27	-9						8	49		81 to 85	1
	-26	-8						9	56			163
	-25	-6						9	58
	-24	-6						9	67
	-24	-5						9	69
	-24	-3						9
	-24	-1						9
	-23	0						13
	-23							13
	-22							16
	-21							16
	-20							17
	-20							17
	-19							17
	-19							18
	-19							18
	-18							18
	-18							18
	-17							18
	-17							18
	-16							18
	-14							19
	-14							20
	-13							21
	-12							23
	-10							26
								26
								26
								26
								27
								28
								28
								29
								29
								29
								30
								30
								30
								31
								32
								34
								36
								36
								37
								37
								37
								37
								37
								38
								38
								38
								38
								38
								38
								38
								40
								40
								43
								43
								45
								45
								46
								47
								47
								47
								47
								48
								48
								48
								48
								49
								49
								49
								49
								49
								49
								50
								50
								52
								54
								55
								56
								57
								57
								57
								57
								57
								58
								58
								58
								58
								59
								59
								59
								59
								60
								60
								63
								63
								64
								66
								67
								67
								67
								67
								67
								68
								68
								69
								69
								69
								69
								69
								70
								73
								75
								76
								76
								77
								77
								77
								78
								78
								78
								79
								79
								80
								81
