# Supplementary material for: Cell cycle entry triggers a switch between two modes of Cdc42 activation during yeast polarization
Source: eLife journal article supplement (doi:10.7554/elife.26722), 2017-07-06
Supplement: supp [file elife-26722-supp-v1.zip › elife_poa_e26722_Figure_8_source_data_1.xlsx]

## Sheet: Sheet1
Light				Dark					Light				Dark
DMSO - Cdc42 Biosensor		LatrunculinA - Cdc42 Biosensor		DMSO - Cdc42 Biosensor		LatrunculinA - Cdc42 Biosensor			LatrunculinA - Bem1		DMSO - Bem1		LatrunculinA - Bem1		DMSO - Bem1
Polarization	Whi5	Polarization	Whi5	Polarization	Whi5	Polarization	Whi5		Polarization	Whi5	Polarization	Whi5	Polarization	Whi5	Polarization	Whi5
1	21	-41	6	-16	5	-14	4		0	7	1	3	1	19	1	2
-32	10	-35	7	-9	5	3	4		1	11	1	7	3	19	1	4
-13	11	-35	9	-4	5	4	6		1	13	2	8	5	19	4	5
-12	12	-30	11	-1	5	6	7		1	18	3	9	7	20	5	6
-12	13	-17	14	1	7	7	8		3	21	5	9	8	21	5	8
-11	15	-17	17	1	7	7	8		4	22	5	10	8	22	5	8
-9	15	-14	28	1	7	8	9		5	31	5	10	9	22	6	9
-9	20	-13	29	2	9	9	9		6	32	5	10	11	25	7	9
-8	22	-12	34	2	9	9	9		6	33	5	11	13	29	9	10
-7	24	-10	40	2	9	9	10		6	34	6	11	14	30	9	10
-6	24	-10	44	2	9	10	11		7	37	6	11	15	31	9	11
-6	27	-9	45	3	10	10	15		8	37	6	12	17	31	9	11
-5	27	-7	46	3	10	10	16		8	38	7	14	18	32	9	11
-4	30	-4	47	3	10	10	20		9	39	9	15	19	33	9	12
-3	33	-2	47	3	10	11	20		9	41	9	15	21	35	9	12
-3	34	-1	53	3	11	12	22		9	41	10	15	24	36	10	13
5	36	4	54	4	11	12	24		10	42	12	17	25	38	10	13
6	44	5	54	4	12	13	24		10	43	12	17	27	38	10	15
6	44	5	54	4	12	15	31		11	44	15	19	no whi5	38	11	16
12	49	7	67	4	12	16	33		12	46	16	20	no whi5	39	11	16
20	76	11	67	4	14	19	33		12	46	16	20	no whi5	40	12	17
non-polarized	na	14	78	5	15	19	34		13	46	18	21	no whi5	42	12	17
		24	78	5	15	23	34		15	49	20	21	no whi5	43	13	21
		non-polarized	88	5	15	25	35		15	52	20	21	no whi5	46	13	21
		non-polarized	na	5	16	non polarized	35		15	55	21	22	no whi5	47	14	22
		non-polarized	na	5	16	non-polarized	38		16	55	22	24	no whi5	47	14	22
		polarized	na	6	16	non-polarized	38		16	56	23	25	no whi5	49	15	26
		polarized	na	6	17	non-polarized	40		16	58	30	30	no whi5	49	16	26
				6	17	non-polarized	44		19	59	33	31	no whi5	49	16	28
				6	17	non-polarized	45		23	59	35	35	no whi5	50	17	29
				6	18	non-polarized	45		26	61	57	39	no whi5	51	18	31
				6	18	non-polarized	46		26	61	no whi5	43	no whi5	51	18	31
				6	19	non-polarized	49		41	61	non-polarized	44	no whi5	53	18	31
				7	19	non-polarized	50		no whi5	63			no whi5	54	18	31
				7	20	non-polarized	54		no whi5	64			no whi5	54	18	33
				7	20	non-polarized	55		no whi5	73			no whi5	56	19	33
				8	22	non-polarized	55		no whi5	na			no whi5	56	22	41
				8	22	non-polarized	57		no whi5	na			no whi5	56	23	42
				8	22	non-polarized	57		non-polarized	na			no whi5	57	31	42
				8	22	non-polarized	58		non-polarized	na			no whi5	57	Bem1 unclear	44
				9	23	non-polarized	58		non-polarized	na			no whi5	57	Bem1 unclear	46
				9	23	non-polarized	59		polarized	na			no whi5	57	Bem1 unclear	46
				9	24	non-polarized	60		polarized	na			no whi5	63	Bem1 unclear	48
				9	24	non-polarized	61						no whi5	66	no whi5	48
				9	25	non-polarized	62						non-polarized	67	no whi5	53
				10	26	non-polarized	63						non-polarized	67	no whi5	55
				10	26	non-polarized	65						non-polarized	69	non-polarized	57
				10	28	non-polarized	67						non-polarized	70	non-polarized	58
				10	28	non-polarized	69						non-polarized	72	non-polarized	59
				12	29	non-polarized	73						non-polarized	75	non-polarized	61
				12	29	non-polarized	74						non-polarized	76	non-polarized	-
				13	29	non-polarized	79						non-polarized	78	non-polarized	na
				13	31	non-polarized	82						non-polarized	91	polarized	na
				13	32	non-polarized	84						non-polarized	na	polarized	na
				14	33	non-polarized	85						non-polarized	na	polarized	na
				14	33	non-polarized	86						non-polarized	na	polarized	NA
				15	34	non-polarized	88						non-polarized	na	polarized	NA
				15	34	non-polarized	95						non-polarized	na
				16	34	non-polarized	na						non-polarized	na
				16	35	non-polarized	na						non-polarized	na
				17	40	non-polarized	na						non-polarized	na
				17	46	non-polarized	na						non-polarized	na
				19	46	non-polarized	na						non-polarized	na
				21	46	non-polarized	na						non-polarized	na
				23	47	non-polarized	na						non-polarized	na
				non-polarized	48	non-polarized	na						non-polarized	na
				non-polarized	49	non-polarized	na						non-polarized	na
				non-polarized	57	polarized	na						non-polarized	na
				non-polarized	60	polarized	na						non-polarized	na
				non-polarized	73	polarized	na						non-polarized	na
				non-polarized	na	polarized	na						non-polarized	na
				polarized	na	polarized	na						non-polarized	na
				polarized	na	polarized	na						non-polarized	na
				polarized	na	polarized	na						non-polarized	na
						polarized	na						non-polarized	na
													non-polarized	na
													non-polarized	na
													non-polarized	na
													non-polarized	na
													non-polarized
													non-polarized
