# Supplementary material for: Cell cycle entry triggers a switch between two modes of Cdc42 activation during yeast polarization
Source: eLife journal article supplement (doi:10.7554/elife.26722), 2017-07-06
Supplement: supp [file elife-26722-supp-v1.zip › elife_poa_e26722_Figure_9_source_data_1.xlsx]

## Sheet: Sheet1
		Cdc42 Biosensor 2 Sites			Cdc42 Biosensor 1 Site					Bem1 2 Sites			Bem1 1 Sites
		Number of Cells	Total Cells	Percent Cells	Number of Cells	Total Cells	Percent Cells		-45	Number of Cells	Total Cells	Percent Cells	Number of Cells	Total Cells	Percent Cells
	-45	0	25	0	0	25	0		-44	0	22	0	0	22	0
	-44	0	25	0	0	25	0		-43	0	22	0	0	22	0
	-43	0	25	0	0	25	0		-42	0	22	0	0	22	0
	-42	0	25	0	0	25	0		-41	0	22	0	0	22	0
	-41	2	25	8	0	25	0		-40	0	22	0	0	22	0
	-40	2	25	8	2	25	8		-39	0	22	0	0	22	0
	-39	2	25	8	2	25	8		-38	0	22	0	0	22	0
	-38	4	25	16	0	25	0		-37	0	22	0	0	22	0
	-37	4	25	16	0	25	0		-36	0	22	0	0	22	0
	-36	2	25	8	2	25	8		-35	0	22	0	0	22	0
	-35	2	25	8	4	25	16		-34	0	22	0	0	22	0
	-34	0	25	0	6	25	24		-33	0	22	0	0	22	0
	-33	0	25	0	6	25	24		-32	0	22	0	0	22	0
	-32	0	25	0	6	25	24		-31	0	22	0	0	22	0
	-31	0	25	0	6	25	24		-30	0	22	0	0	22	0
	-30	0	25	0	8	25	32		-29	0	22	0	0	22	0
	-29	4	25	16	4	25	16		-28	0	22	0	0	22	0
	-28	4	25	16	4	25	16		-27	0	22	0	0	22	0
	-27	6	25	24	2	25	8		-26	0	22	0	2	22	9.09091
	-26	8	25	32	2	25	8		-25	0	22	0	0	22	0
	-25	10	25	40	2	25	8		-24	0	22	0	0	22	0
	-24	8	25	32	4	25	16		-23	0	22	0	2	22	9.09091
	-23	10	25	40	4	25	16		-22	0	22	0	0	22	0
	-22	14	25	56	2	25	8		-21	0	22	0	0	22	0
	-21	11	25	44	6	25	24		-20	0	22	0	2	22	9.09091
	-20	13	25	52	6	25	24		-19	0	22	0	0	22	0
	-19	17	25	68	4	25	16		-18	0	22	0	2	22	9.09091
	-18	14	25	56	6	25	24		-17	0	22	0	2	22	9.09091
	-17	11	25	44	10	25	40		-16	0	22	0	4	22	18.1818
	-16	15	25	60	8	25	32		-15	0	22	0	4	22	18.1818
	-15	15	25	60	8	25	32		-14	0	22	0	5	22	22.7273
	-14	17	25	68	8	25	32		-13	0	22	0	7	22	31.8182
	-13	17	25	68	8	25	32		-12	0	22	0	7	22	31.8182
	-12	17	25	68	8	25	32		-11	0	22	0	7	22	31.8182
	-11	17	25	68	8	25	32		-10	2	22	9.09091	9	22	40.9091
	-10	8	25	32	17	25	68		-9	0	22	0	13	22	59.0909
	-9	6	25	24	18	25	72		-8	2	22	9.09091	15	22	68.1818
	-8	6	25	24	19	25	76		-7	2	22	9.09091	17	22	77.2727
	-7	8	25	32	17	25	68		-6	0	22	0	18	22	81.8182
	-6	2	25	8	23	25	92		-5	0	22	0	20	22	90.9091
	-5	2	25	8	23	25	92		-4	0	22	0	22	22	100
	-4	6	25	24	19	25	76		-3	0	22	0	22	22	100
	-3	4	25	16	21	25	84		-2	0	22	0	22	22	100
	-2	0	25	0	25	25	100		-1	0	22	0	22	22	100
	-1	2	25	8	23	25	92		0	0	22	0	22	22	100
	0	0	25	0	25	25	100		0	0	22	0	22	22	100
