# Supplementary material for: Cell cycle entry triggers a switch between two modes of Cdc42 activation during yeast polarization
Source: eLife journal article supplement (doi:10.7554/elife.26722), 2017-07-06
Supplement: supp [file elife-26722-supp-v1.zip › elife_poa_e26722_Supplementary_File_2.xlsx]

## Sheet: Figure1
Figure 1
	Figure 1D
	WYK8308
	0 pulse/0sec	1 at 10% pulse/60 sec	1 pulse/60sec	2 pulse/60sec	3 pulse/60sec	3 pulse/30sec	3 pulse/15sec	3 pulse/10sec
Replicates	2	3	2	2	2	2	2	2
N Cells	21	39	37	31	26	17	23	17
Mean	As indicated	As indicated	As indicated	As indicated	As indicated	As indicated	As indicated	As indicated
Median	0.189405	0.484989	0.911403	0.965183	0.758919	0.834414	0.719686	0.76686
STD	0.597612	0.748683	0.493744	0.307167	0.209884	0.631446	0.651686	0.50873
SEM	0.13041	0.119885	0.0811709	0.0551689	0.0411617	0.153148	0.135886	0.123385
Statistical Test	Mann-Whitney U	Mann-Whitney U	Mann-Whitney U	Mann-Whitney U	Mann-Whitney U	Mann-Whitney U	Mann-Whitney U	Mann-Whitney U
p-Value	Figure 1-Sup 1	Figure 1-Sup 1	Figure 1-Sup 1	Figure 1-Sup 1	Figure 1-Sup 1	Figure 1-Sup 1	Figure 1-Sup 1	Figure 1-Sup 1
	WYK8440
	0 pulse/0sec	1 at 10% pulse/60 sec	1 pulse/60sec	2 pulse/60sec	3 pulse/60sec	3 pulse/30sec	3 pulse/15sec	3 pulse/10sec
Replicates	2	2	2	2	2	2	2	4
N Cells	17	30	43	35	48	29	22	15
Mean	As indicated	As indicated	As indicated	As indicated	As indicated	As indicated	As indicated	As indicated
Median	0.106667	0.841781	0.893841	0.917755	0.914621	0.919063	0.882872	0.691063
STD	0.638215	0.689348	0.394976	0.288527	0.555893	0.201877	0.301019	0.684605
SEM	0.15479	0.125857	0.0602333	0.0487699	0.0802363	0.0374877	0.0641774	0.176764
Statistical Test	Mann-Whitney U	Mann-Whitney U	Mann-Whitney U	Mann-Whitney U	Mann-Whitney U	Mann-Whitney U	Mann-Whitney U	Mann-Whitney U
p-Value	Figure 1 - Sup 1	Figure 1 - Sup 1	Figure 1 - Sup 1	Figure 1 - Sup 1	Figure 1 - Sup 1	Figure 1 - Sup 1	Figure 1 - Sup 1	Figure 1 - Sup 1
	Figure 1F (Non-Polarized)
	WYK8308
	0 pulse/0sec	1 at 10% pulse/60 sec	1 pulse/60sec	2 pulse/60sec	3 pulse/60sec	3 pulse/30sec	3 pulse/15sec	3 pulse/10sec
Replicates	2	3	2	2	2	2	2	2
N Cells	47	39	37	31	26	17	23	17
Mean	As indicated	As indicated	As indicated	As indicated	As indicated	As indicated	As indicated	As indicated
Median	1.00318	1.01813	1.02464	1.05313	1.03484	1.01765	1.01218	1.00769
STD	0.0515929	0.0399878	0.0800793	0.042988	0.0743318	0.0409416	0.0363059	0.0307455
SEM	0.0075256	0.00640317	0.013165	0.00772088	0.0145777	0.0099298	0.00757031	0.00745688
Statistical Test	Mann-Whitney U	Mann-Whitney U	Mann-Whitney U	Mann-Whitney U	Mann-Whitney U	Mann-Whitney U	Mann-Whitney U	Mann-Whitney U
p-Value	Figure 1-Sup 5	Figure 1-Sup 5	Figure 1-Sup 5	Figure 1-Sup 5	Figure 1-Sup 5	Figure 1-Sup 5	Figure 1-Sup 5	Figure 1-Sup 5
	WYK8440
	0 pulse/0sec	1 at 10% pulse/60 sec	1 pulse/60sec	2 pulse/60sec	3 pulse/60sec	3 pulse/30sec	3 pulse/15sec	3 pulse/10sec
Replicates	2	2	2	2	2	2	2	4
N Cells	87	30	43	35	48	29	22	15
Mean	As indicated	As indicated	As indicated	As indicated	As indicated	As indicated	As indicated	As indicated
Median	1.0217	1.04064	1.08696	1.08813	1.06397	1.06452	1.03875	1.03182
STD	0.0448618	0.0472978	0.0801279	0.0822947	0.115922	0.0563843	0.0654424	0.0162425
SEM	0.00254788	0.00863536	0.0122194	0.0139103	0.0167319	0.0104703	0.0139524	0.00419381
Statistical Test	Mann-Whitney U	Mann-Whitney U	Mann-Whitney U	Mann-Whitney U	Mann-Whitney U	Mann-Whitney U	Mann-Whitney U	Mann-Whitney U
p-Value	Figure 1-Sup 5	Figure 1-Sup 5	Figure 1-Sup 5	Figure 1-Sup 5	Figure 1-Sup 5	Figure 1-Sup 5	Figure 1-Sup 5	Figure 1-Sup 5
	Figure 1F (Polarized)
	WYK8308
	0 pulse/0sec	1 at 10% pulse/60 sec	1 pulse/60sec	2 pulse/60sec	3 pulse/60sec	3 pulse/30sec	3 pulse/15sec	3 pulse/10sec
Replicates	2	3	2	2	2	2	2	2
N Cells	71	96	30	44	23	46	44	15
Mean	As indicated	As indicated	As indicated	As indicated	As indicated	As indicated	As indicated	As indicated
Median	0.996713	0.989404	1.00082	0.999448	1.00546	0.999708	0.996482	0.992501
STD	0.0158888	0.0415017	0.0280112	0.0252984	0.050417	0.0218558	0.0173764	0.0179451
SEM	0.00188565	0.00423574	0.00511412	0.00381388	0.0105127	0.00322247	0.00261959	0.00463341
Statistical Test	Mann-Whitney U	Mann-Whitney U	Mann-Whitney U	Mann-Whitney U	Mann-Whitney U	Mann-Whitney U	Mann-Whitney U	Mann-Whitney U
p-Value	Figure 1-Sup 5	Figure 1-Sup 5	Figure 1-Sup 5	Figure 1-Sup 5	Figure 1-Sup 5	Figure 1-Sup 5	Figure 1-Sup 5	Figure 1-Sup 5
	WYK8440
	0 pulse/0sec	1 at 10% pulse/60 sec	1 pulse/60sec	2 pulse/60sec	3 pulse/60sec	3 pulse/30sec	3 pulse/15sec	3 pulse/10sec
N Experiments	2	2	2	2	2	2	2	4
N Cells	83	40	39	18	60	36	20	34
Mean	As indicated	As indicated	As indicated	As indicated	As indicated	As indicated	As indicated	As indicated
Median	0.998792	0.987384	1.00631	0.996363	1.01522	1.01787	1.01514	1.01339
STD	0.113076	0.0189548	0.0267661	0.0459571	0.039	0.0264026	0.0340222	0.0310916
SEM	0.00317436	0.00299702	0.004286	0.0108322	0.00503487	0.00440043	0.00760759	0.00533217
Statistical Test	Mann-Whitney U	Mann-Whitney U	Mann-Whitney U	Mann-Whitney U	Mann-Whitney U	Mann-Whitney U	Mann-Whitney U	Mann-Whitney U
p-Value	Figure 1-Sup 5	Figure 1-Sup 5	Figure 1-Sup 5	Figure 1-Sup 5	Figure 1-Sup 5	Figure 1-Sup 5	Figure 1-Sup 5	Figure 1-Sup 5
	Figure 1-Supplemental 2
	WYK8476
	1 at 10% pulse/60 sec	1 pulse/60sec	2 pulse/60sec	3 pulse/60sec	3 pulse/30sec	3 pulse/15sec	3 pulse/10sec
N Experiments	5	5	5	5	5	5	5
N Cells	92	54	89	88	116	83	116
Mean	0.994918	1.01008	1.11214	1.10705	1.10197	1.07808	1.06501
Median	0.99394	1.00738	1.10584	1.09472	1.09051	1.07277	1.06786
STD	0.0198449	0.021016	0.0623855	0.0686212	0.0745716	0.0672902	0.0463715
SEM	0.00206898	0.00285991	0.00661285	0.00731505	0.0069238	0.00738606	0.00430549
	Figure 1-Supplemental 4
	WYK8598		WYK8599
	Light	Dark	Light	Dark
Replicates	3		3
N Cells	42		42
Mean	As indicated	As indicated	As indicated	As indicated
Median	0.635835	0.167899	0.718588	0.0546667
STD	0.491884	0.632491	0.389872	0.552145
SEM	As indicated	As indicated	As indicated	As indicated
Statistical Test	Mann-Whitney U		Mann-Whitney U
p-Value	0.00254772		4.24897e-06

## Sheet: Figure2
Figure 2
	Figure 2B
	WYK8308		WYK8318		WYK8576
	Light	Dark	Light	Dark	Light	Dark
Replicates	2	2	2	2	2	2
N Cells	31	33	39	22	38	37
Mean	Figure 2-Sup 1	Figure 2-Sup 1	Figure 2-Sup 1	Figure 2-Sup 1	Figure 2-Sup 1	Figure 2-Sup 1
Median	-12	-13	-9	-12	-9	-13
STD	4.03879	3.96098	4.03794	4.13228	4.03946	4.61278
SEM	0.725388	0.689519	0.646589	0.881006	0.741362	0.758337
Statistical Test	N/A	N/A	N/A	N/A	N/A	N/A
p-Value	N/A	N/A	N/A	N/A	N/A	N/A
	Figure 2D
	WYK8308		WYK8434		WYK8435		WYK8436
	Light	Dark	Light	Dark	Light	Dark	Light	Dark
Replicates	3	3	2	2	3	2	3	2
N Cells	43	63	34	29	49	35	61	36
Mean	As Indicated	As Indicated	As Indicated	As Indicated	As Indicated	As Indicated	As Indicated	As Indicated
Median	0.8	0.08	0.76	-0.24	0.62	0.16	0.24	-0.02
STD	0.281486	0.605346	0.481163	0.537041	0.463774	0.596419	0.674709	0.594087
SEM	As Indicated	As Indicated	As Indicated	As Indicated	As Indicated	As Indicated	As Indicated	As Indicated
Statistical Test	Mann-Whitney U		Mann-Whitney U		Mann-Whitney U		Mann-Whitney U
p-Value	1.08332e-11		0.000526391		0.000434232		0.921973
Significance	Statistically Signficant		Statistically Signficant		Statistically Signficant		NS
Comparative p-Values	See Below	See Below	See Below	See Below	See Below	See Below	See Below	See Below
pValue	WYK8308	WYK8434	WYK8435	WYK8436		Significance	WYK8308	WYK8434	WYK8435	WYK8436
WYK8308						WYK8308
WYK8434	0.856586					WYK8434	NS
WYK8435	4.59168e-08	2.04994e-09				WYK8435	*	*
WYK8436	1.73243e-08	1.55548e-09	0.137492			WYK8436	*	*	NS

## Sheet: Figure3
Figure 3
	Figure 3B
	WYK8440		WYK8437		WYK8439			pValue	WYK8440	WYK8437	WYK8439
	Light	Dark	Light	Dark	Light	Dark		WYK8440
Replicates	2	2	2	2	2	2		WYK8437	0.0581048
N Cells	33	36	15	15	19	17		WYK8439	0.000977538	0.000839992
Mean	As Indicated	As Indicated	As Indicated	As Indicated	As Indicated	As Indicated
Median	0.856098	0.281538	0.831515	0.125641	-0.0607056	0.174444		Significance	WYK8440	WYK8437	WYK8439
STD	0.162869	0.652695	0.428326	0.443907	0.620231	0.583921		WYK8440
SEM	As Indicated	As Indicated	As Indicated	As Indicated	As Indicated	As Indicated		WYK8437	NS
Statistical Test	Mann-Whitney U	Mann-Whitney U	Mann-Whitney U	Mann-Whitney U	Mann-Whitney U	Mann-Whitney U		WYK8439	*	*
p-Value	7.08486e-08		0.0072301		0.407796
Significance	Statistically Significant		Statistically Significant		NS
Comparative p-Values	See Right	See Right	See Right	See Right	See Right	See Right
	Figure 3D
	WYK8440		WYK8301
	Light	Dark	Light	Dark
Replicates	2	2	2	2
N Cells	33	34	24	15
Mean	Figure 3 - Sup 1	Figure 3 - Sup 1	Figure 3 - Sup 1	Figure 3 - Sup 1
Median	-27	-13	-13	-11
STD	8.1587	4.9194	3.23449	3.64155
SEM	1.42025	0.843671	0.660238	0.531174
Statistical Test	N/A	N/A	N/A	N/A
p-Value	N/A	N/A	N/A	N/A

## Sheet: Figure4
Figure 4
	Figure 4B
	Cdc24/Bem1_G1	Cdc24/Bem1_G1S	Bem1/Cdc24_G1	Bem1/Cdc24_G1S
Replicates	2	2	2	2
N Cells	25	10	25	10
N Puncta	148	59	173	53
Mean	As Indicated	As Indicated	As Indicated	As Indicated
Median	0.333333	0.633333	0.222222	0.75
STD	0.155438	0.301237	0.141422	0.263781
SEM	As Indicated	As Indicated	As Indicated	As Indicated
Statistical Test	Mann-Whitney U		Mann-Whitney U
p-Value	2.82229e-07		8.83643e-09
Significance	Statistically Significant		Statistically Significant
	Cdc42/Bem1_G1	Cdc42/Bem1_G1S	Bem1/Cdc42_G1	Bem1/Cdc42_G1S
Replicates	2	2	2	2
N Cells	25	12	25	12
N Puncta	205	87	180	75
Mean	As Indicated	As Indicated	As Indicated	As Indicated
Median	0.285714	0.675	0.4	1
STD	0.107333	0.205031	0.122898	0.165774
SEM	As Indicated	As Indicated	As Indicated	As Indicated
Statistical Test	Mann-Whitney U		Mann-Whitney U
p-Value	1.5275e-09		2.16275e-09
Significance	Statistically Significant		Statistically Significant
	Cdc42/Cdc24_G1	Cdc42/Cdc24_G1S	Cdc24/Cdc42_G1	Cdc24/Cdc42_G1S
Replicates	2	2	2	2
N Cells	25	12	25	12
N Puncta	181	58	140	53
Mean	As Indicated	As Indicated	As Indicated	As Indicated
Median	0.428571	0.366667	0.5	0.45
STD	0.244928	0.252496	0.259813	0.262948
SEM	As Indicated	As Indicated	As Indicated	As Indicated
Statistical Test	Mann-Whitney U		Mann-Whitney U
p-Value	0.0567262		0.0570833
Significance	NS		NS

## Sheet: Figure5
Figure 5
	Figure 5B, Figure 5 - Sup 1, Figure 5 - Sup 2
	WYK8500					WYK8502
	Light - Cdc42 Biosensor	Dark - Cdc42 Biosensor	Light - Whi5 Nuclear Exit	Dark - Whi5 Nuclear Exit	Combined - Whi5 Nuclear Exit	Light - Bem1	Dark - Bem1	Light - Whi5 Nuclear Exit	Dark - Whi5 Nuclear Exit	Combined - Whi5 Nuclear Exit
Replicates	3	3	3	3	6	4	3	4	3	7
N Cells	28	28	28	28	56	35	45	35	45	80
Mean	-26.5	-12.42	-20.6071	-19.1786	-19.8929	-13.0286	-11.7333	-21.0857	-23.2222	-22.2875
Median	-25.5	-12	-20	-18.5	-19.5	-13	-11	-22	-23	-23
STD	9.32738	3.86272	5.18073	5.50457	5.3451	3.49357	2.71695	5.2152	6.58817	6.08421
SEM	1.76271	0.729986	0.979066	1.04027	0.714269	0.590521	0.405019	0.88153	0.982107	0.680235
Statistical Test	N/A	N/A	N/A	N/A	N/A	N/A	N/A	N/A	N/A	N/A
p-Value	N/A	N/A	N/A	N/A	N/A	N/A	N/A	N/A	N/A	N/A
	Figure 5D
	WYK8441				WYK8442
	DMSO - Bem1	DMSO - Bud Emergence	1NMPP1 - Bem1	1NMPP1 - Bud Emergence	DMSO - Cdc42 Biosensor	DMSO - Bud Emergence	1NMPP1 - Cdc42 Biosensor	1NMPP1 - Bud Emergence
Replicates	2	2	2	2	2	2	2	2
N Cells	33	33	34	34	26	26	40	40
Mean	Figure 5 - Sup 3	Figure 5 - Sup 3	Figure 5 - Sup 3	Figure 5 - Sup 3	Figure 5 - Sup 3	Figure 5 - Sup 3	Figure 5 - Sup 3	Figure 5 - Sup 3
Median	33	44	0	0	9.5	47.5	47	0
STD	14.3815	14.0136	0	0	14.5435	20.0679	21.0165	0
SEM	2.67058	2.60227	0	0	2.85222	3.93564	3.55243	0
Statistical Test	N/A	N/A	N/A	N/A	N/A	N/A	N/A	N/A
p-Value	N/A	N/A	N/A	N/A	N/A	N/A	N/A	N/A

## Sheet: Figure6
Figure 6
	Figure 6B
	WYK8440						WYK8308
	Bin Time = -45	Bin Time = -35	Bin Time = -25	Bin Time = -15	Bin Time = -5		Bin Time = -45	Bin Time = -35	Bin Time = -25	Bin Time = -15	Bin Time = -5
Replicates	2	2	2	2	2		2	2	2	2	2
N Cells	10	15	16	29	11		10	12	19	18	10
Mean	Figure 6B	Figure 6B	Figure 6B	Figure 6B	Figure 6B		Figure 6B	Figure 6B	Figure 6B	Figure 6B	Figure 6B
Median	0.3	0.282973	0.56	0.684915	0.64		-0.08	-0.120642	-0.2	0.58	0.8
STD	0.627353	0.631332	0.451809	0.257521	0.324924		0.737889	0.63738	0.620595	0.392968	0.279285
SEM	Figure 6B	Figure 6B	Figure 6B	Figure 6B	Figure 6B		Figure 6B	Figure 6B	Figure 6B	Figure 6B	Figure 6B
Statistical Test	Mann-Whitney U	Mann-Whitney U	Mann-Whitney U	Mann-Whitney U	Mann-Whitney U		Mann-Whitney U	Mann-Whitney U	Mann-Whitney U	Mann-Whitney U	Mann-Whitney U
p-Value	See Below	See Below	See Below	See Below	See Below		See Below	See Below	See Below	See Below	See Below
pValue	Bin Time = -45	Bin Time = -35	Bin Time = -25	Bin Time = -15	Bin Time = -5		pValue	Bin Time = -45	Bin Time = -35	Bin Time = -25	Bin Time = -15	Bin Time = -5
Bin Time = -45							Bin Time = -45
Bin Time = -35	0.337201						Bin Time = -35	0.00506534
Bin Time = -25	0.000640825	0.0050365					Bin Time = -25	5.22194e-05	0.306789
Bin Time = -15	2.32795e-05	0.00619634	0.136523				Bin Time = -15	0.00206735	0.00511188	0.0120101
Bin Time = -5	0.00159369	0.00919476	0.956586	0.214324			Bin Time = -5	0.0438943	0.0132575	7.33091e-06	0.000865545
Significance	Bin Time = -45	Bin Time = -35	Bin Time = -25	Bin Time = -15	Bin Time = -5		Significance	Bin Time = -45	Bin Time = -35	Bin Time = -25	Bin Time = -15	Bin Time = -5
Bin Time = -45							Bin Time = -45
Bin Time = -35	NS						Bin Time = -35	*
Bin Time = -25	*	*					Bin Time = -25	*	NS
Bin Time = -15	*	*	NS				Bin Time = -15	*	*	*
Bin Time = -5	*	*	NS	NS			Bin Time = -5	*	*	*	*
	Figure 6D
	WYK8575
	Light	Dark
Replicates	4	3
N Cells	37	35
Mean	Figure 6 - Sup 1	Figure 6 - Sup 1
Median	-28	-14
STD	19.4227	4.85885
SEM	3.19307	0.821295
Statistical Test	N/A	N/A
p-Value	N/A	N/A

## Sheet: Figure7
Figure 7
	Figure 7D
	WYK8301	WYK8441	WYK8441
	Control	DMSO	1NMPP1
Replicates	4	2	2
N Cells	37	21	68
Mean	As Indicated	As Indicated	0
Median	-28	-12	0
STD	19.4227	2.94311	0
SEM	3.19307	0.64224	0
Statistical Test	N/A	N/A	N/A
p-Value	N/A	N/A	N/A

## Sheet: Figure8
Figure 8
	Figure 8
	WYK8500				WYK8502
	Light		Dark		Light		Dark
	DMSO - Cdc42 Biosensor	LatrunculinA - Cdc42 Biosensor	DMSO - Cdc42 Biosensor	LatrunculinA - Cdc42 Biosensor	DMSO - Bem1	LatrunculinA - Bem1	DMSO - Bem1	LatrunculinA - Bem1
Replicates	2	2	2	2	2	2	2	2
N Cells	22	28	74	75	35	43	60	80
Mean	-4.55	-8.13043	7.24615	11.6087	14.6875	11.4848	12.2051	14.3529
Median	-6	-9	6	10	11	10	11	14
STD	10.8457	16.4546	6.52886	5.64671	12.6324	8.61003	6.2331	7.27101
SEM	2.36672	3.43103	0.809805	1.17742	2.23311	1.49881	0.998095	1.76348
Statistical Test	N/A	N/A	N/A	N/A	N/A	N/A	N/A	N/A
p-Value	N/A	N/A	N/A	N/A	N/A	N/A	N/A	N/A
	Figure 8 - Sup 1
	WYK8500				WYK85502
	Light		Dark		Light		Dark
	DMSO - Whi5 Nuclear Exit	LatrunculinA - Whi5 Nuclear Exit	DMSO - Whi5 Nuclear Exit	LatrunculinA - Whi5 Nuclear Exit	DMSO - Whi5 Nuclear Exit	LatrunculinA - Whi5 Nuclear Exit	DMSO - Whi5 Nuclear Exit	LatrunculinA - Whi5 Nuclear Exit
Replicates	2	2	2	2	2	2	2	2
N Cells	28	22	74	75	35	43	60	80
Mean	28.3	42.375	23.2429	43.1379	17.7188	43	26.4	26.4
Median	25.5	45.5	20	44.5	16	43.5	22	22
STD	16.1412	23.774	14.5537	25.6785	8.97033	16.3794	17.2082	17.2082
SEM	3.52229	4.85284	1.7395	3.37175	1.58574	2.7299	2.43361	2.43361
Statistical Test	N/A	N/A	N/A	N/A	N/A	N/A	N/A	N/A
p-Value	N/A	N/A	N/A	N/A	N/A	N/A	N/A	N/A

## Sheet: Figure9
Figure 9
	Figure 9B
	WYK8440	WYK8301
Replicates	3	2
N Cells	25	22
Mean	N/A	N/A
Median	N/A	N/A
STD	N/A	N/A
SEM	N/A	N/A
