# Supplementary figures and images for: Cell cycle entry triggers a switch between two modes of Cdc42 activation during yeast polarization
Source: eLife journal article supplement (doi:10.7554/elife.26722), 2017-07-06

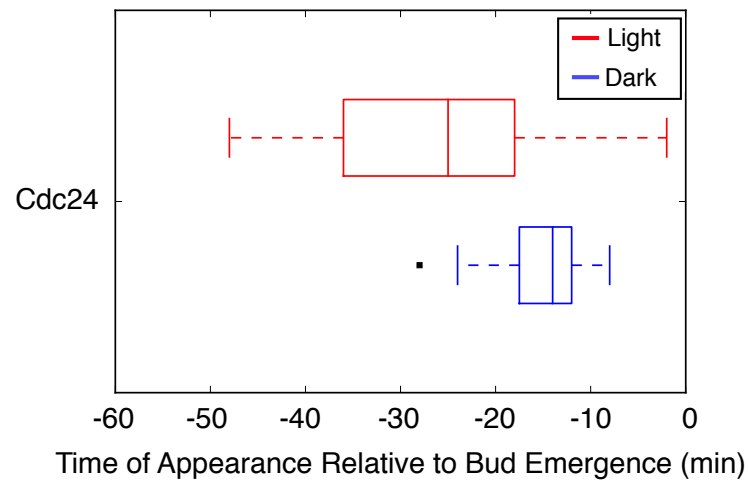

Supplement: supp [file elife-26722-supp-v1.zip › elife_poa_e26722_Figure_6_figure_supplement_1.pdf]

A

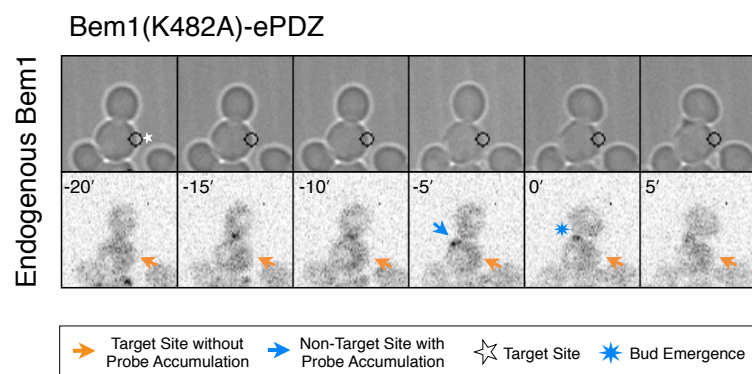

B

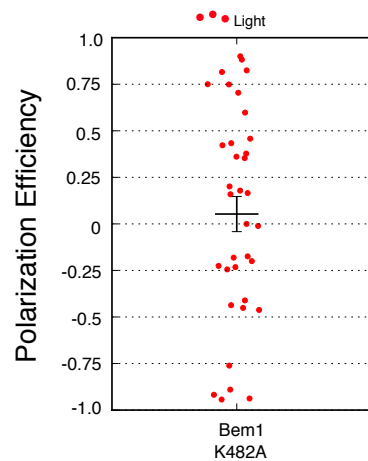

Supplement: supp [file elife-26722-supp-v1.zip › elife_poa_e26722_Figure_2_figure_supplement_2.pdf]

A

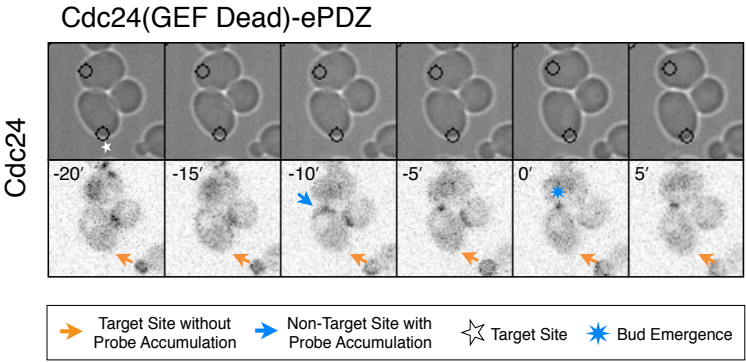

B

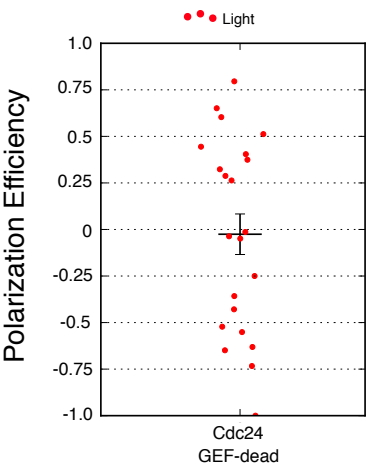

Supplement: supp [file elife-26722-supp-v1.zip › elife_poa_e26722_Figure_6_figure_supplement_2.pdf]

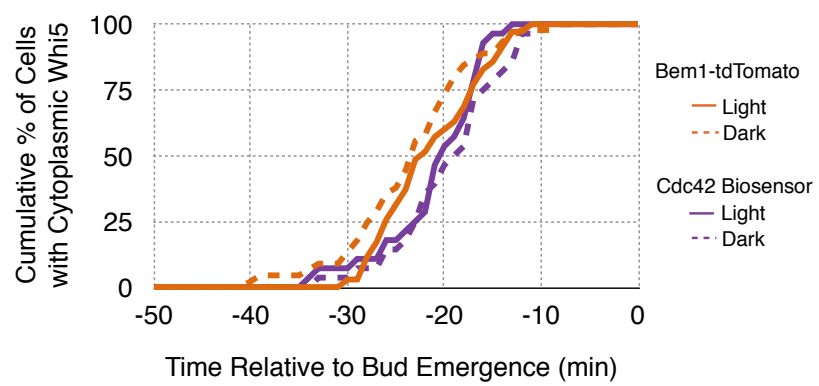

Supplement: supp [file elife-26722-supp-v1.zip › elife_poa_e26722_Figure_5_figure_supplement_1.pdf]

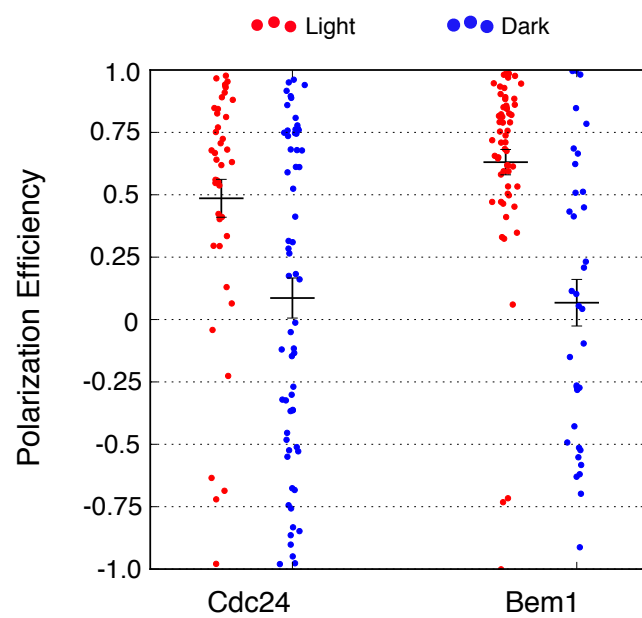

Supplement: supp [file elife-26722-supp-v1.zip › elife_poa_e26722_Figure_1_figure_supplement_4.pdf]

A

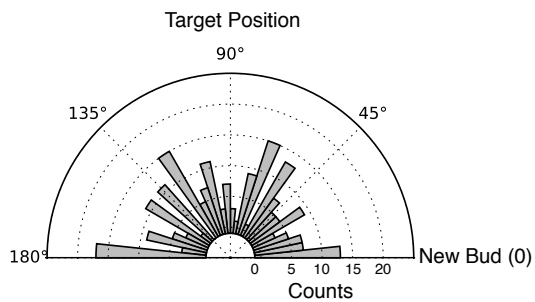

B

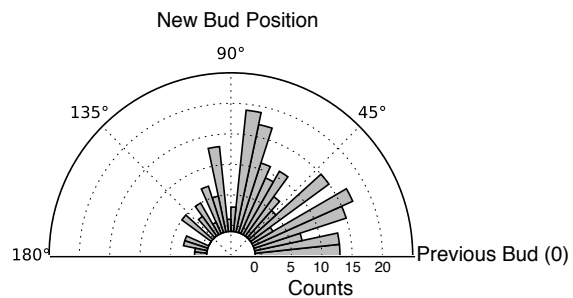

C

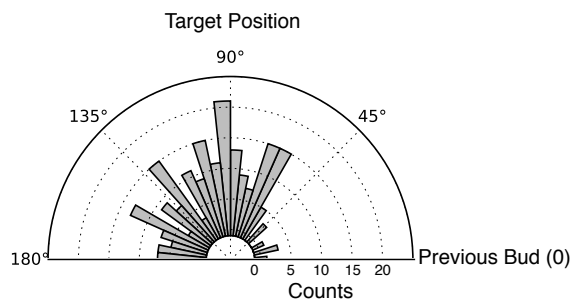

D

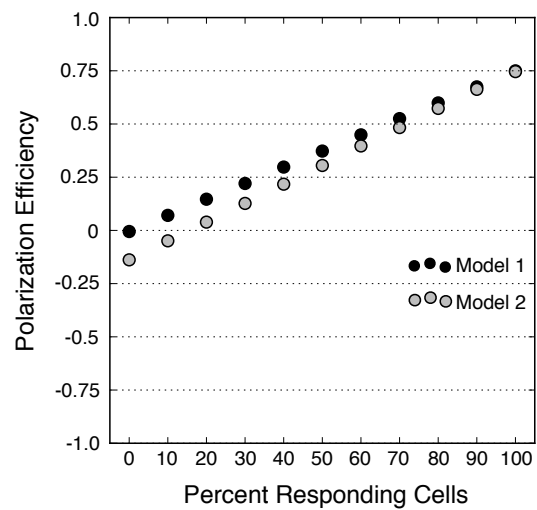

Supplement: supp [file elife-26722-supp-v1.zip › elife_poa_e26722_Figure_1_figure_supplement_3.pdf]

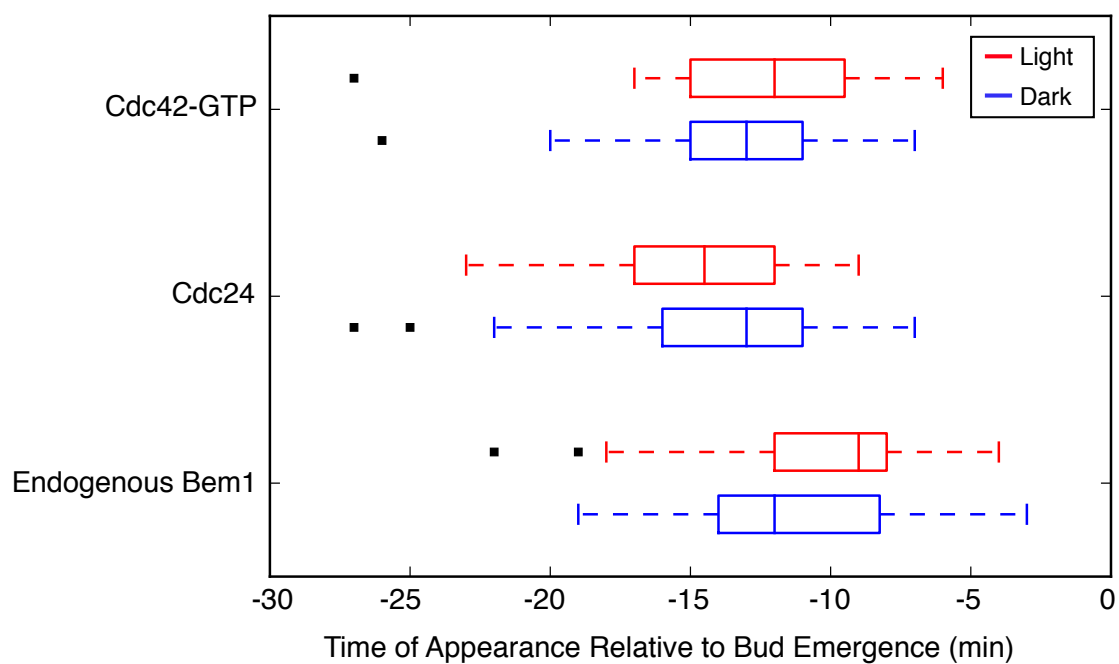

Supplement: supp [file elife-26722-supp-v1.zip › elife_poa_e26722_Figure_2_figure_supplement_1.pdf]

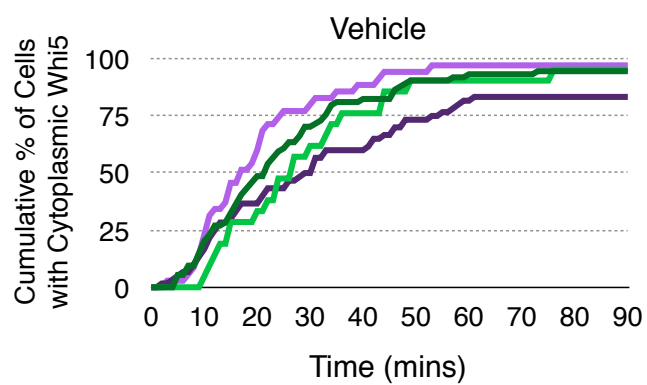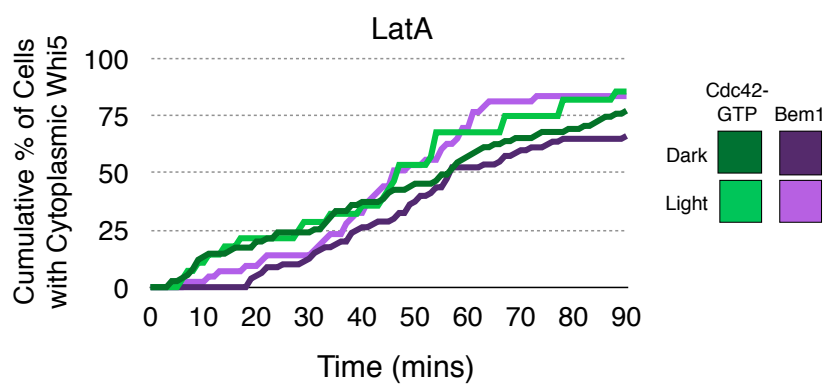

Supplement: supp [file elife-26722-supp-v1.zip › elife_poa_e26722_Figure_8_figure_supplement_1.pdf]

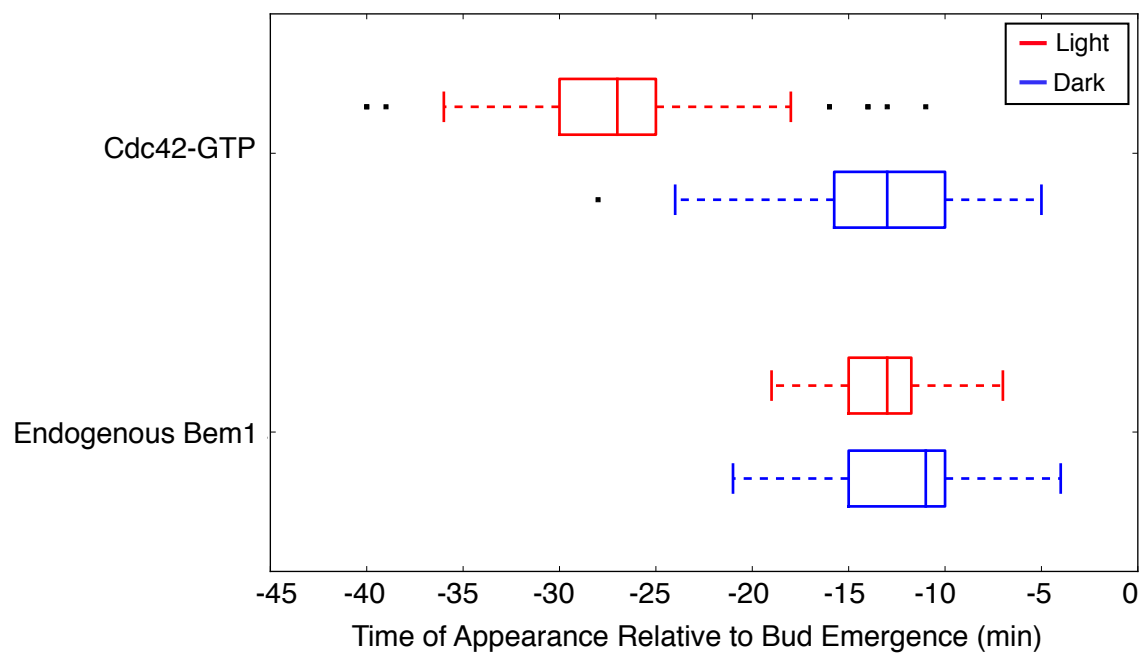

Supplement: supp [file elife-26722-supp-v1.zip › elife_poa_e26722_Figure_3_figure_supplement_1.pdf]

Cdk1 (+)  
+ 1NM-PP1

Cdc42 Biosensor

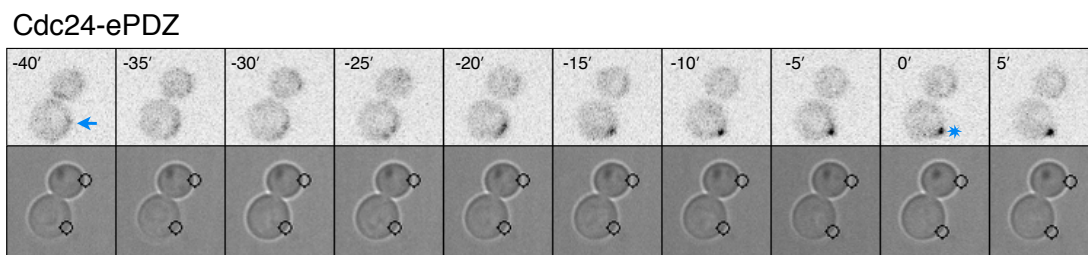

Endogenous Bem1

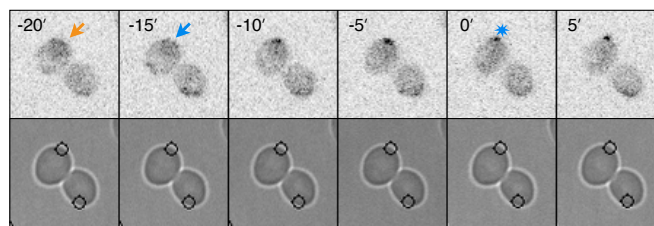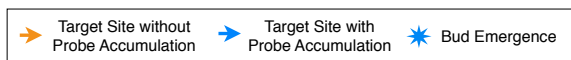

Supplement: supp [file elife-26722-supp-v1.zip › elife_poa_e26722_Figure_5_figure_supplement_4.pdf]

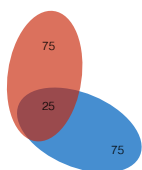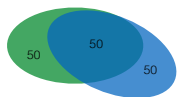

early G1

Bem1

Cdc24

Cdc42-GTP

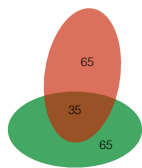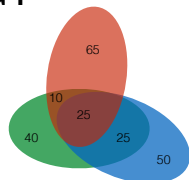

Model

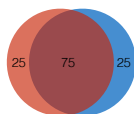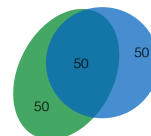

late G1

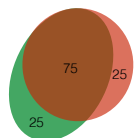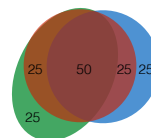

Model

Supplement: supp [file elife-26722-supp-v1.zip › elife_poa_e26722_Figure_4_figure_supplement_1.pdf]

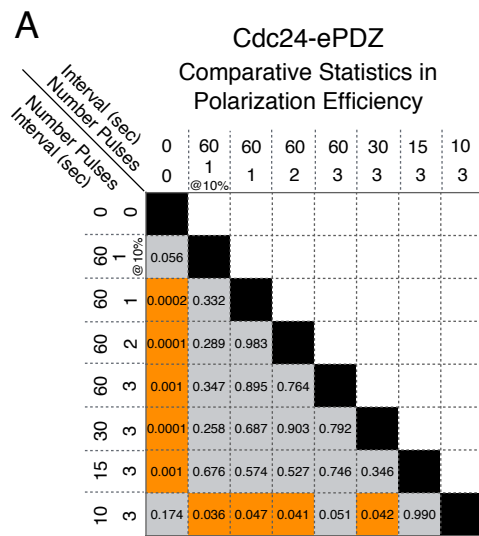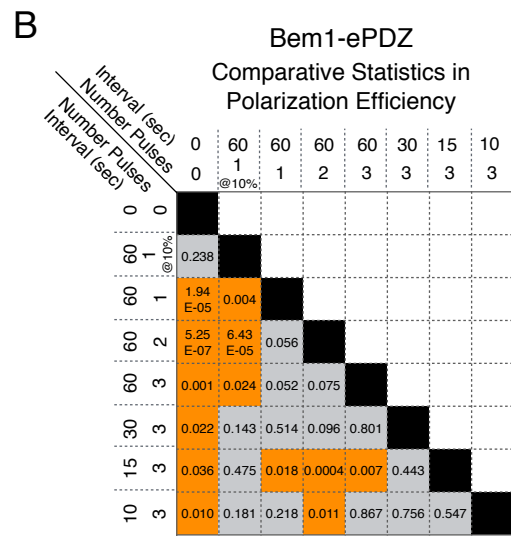

Supplement: supp [file elife-26722-supp-v1.zip › elife_poa_e26722_Figure_1_figure_supplement_1.pdf]

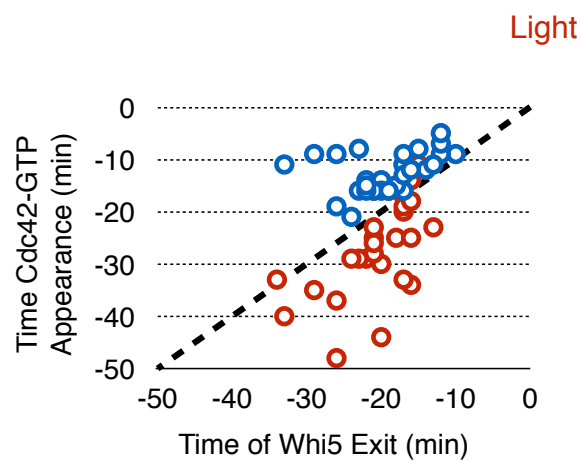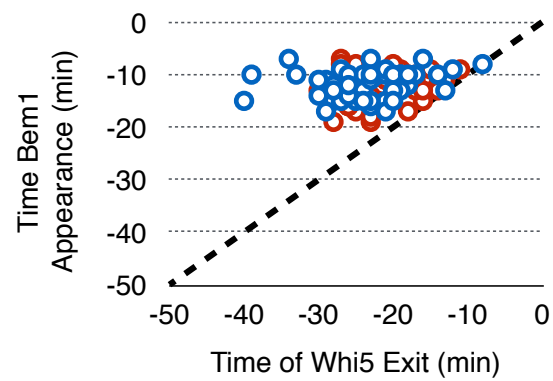

Supplement: supp [file elife-26722-supp-v1.zip › elife_poa_e26722_Figure_5_figure_supplement_2.pdf]

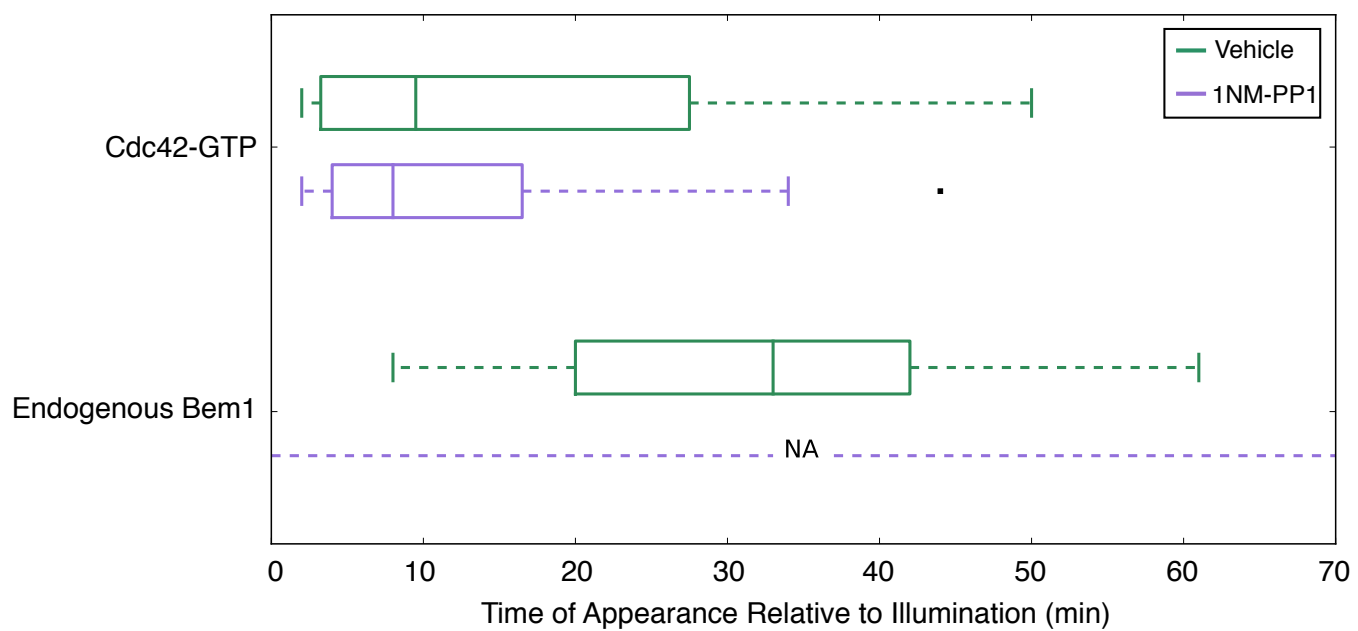

Supplement: supp [file elife-26722-supp-v1.zip › elife_poa_e26722_Figure_5_figure_supplement_3.pdf]

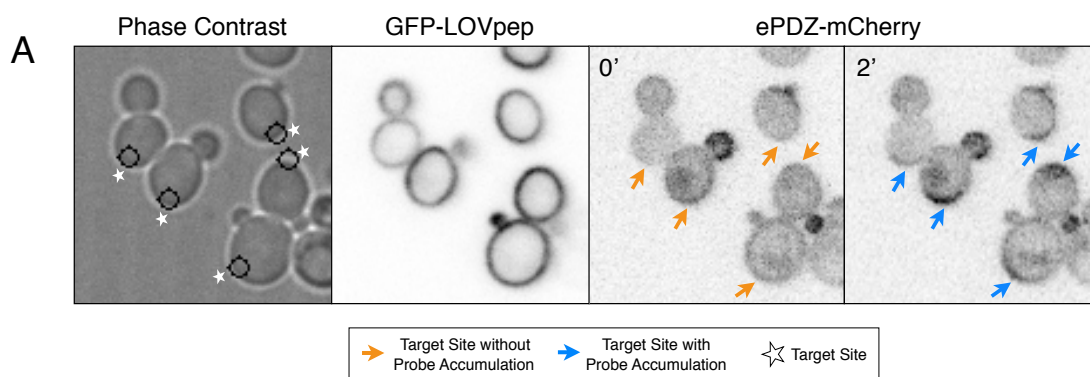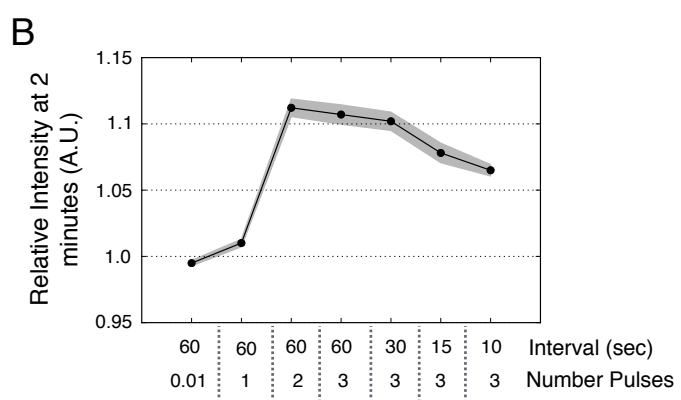

Supplement: supp [file elife-26722-supp-v1.zip › elife_poa_e26722_Figure_1_figure_supplement_2.pdf]

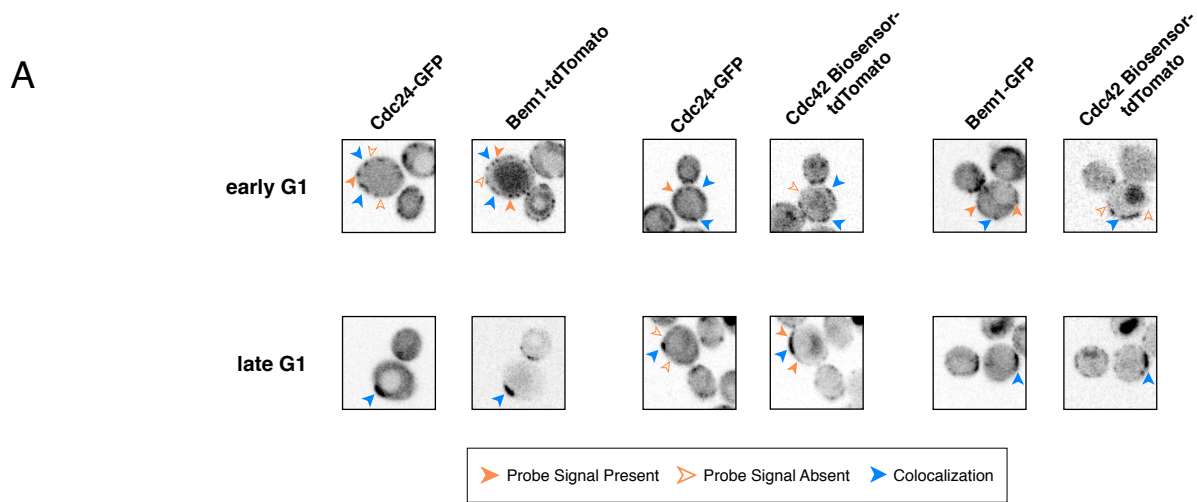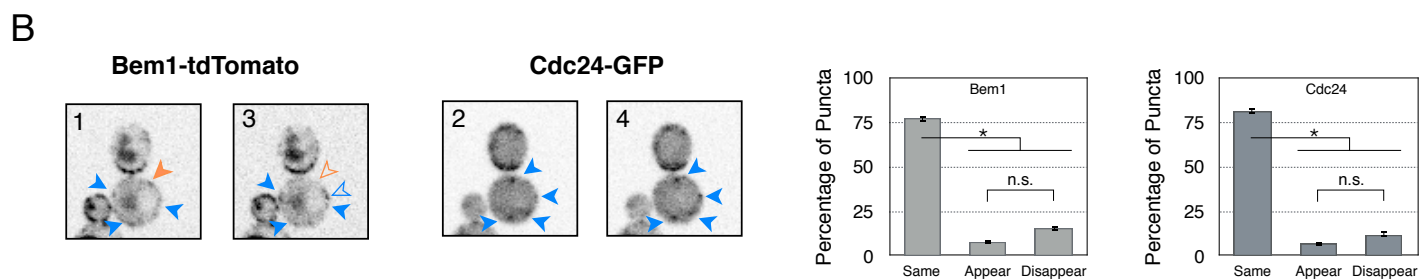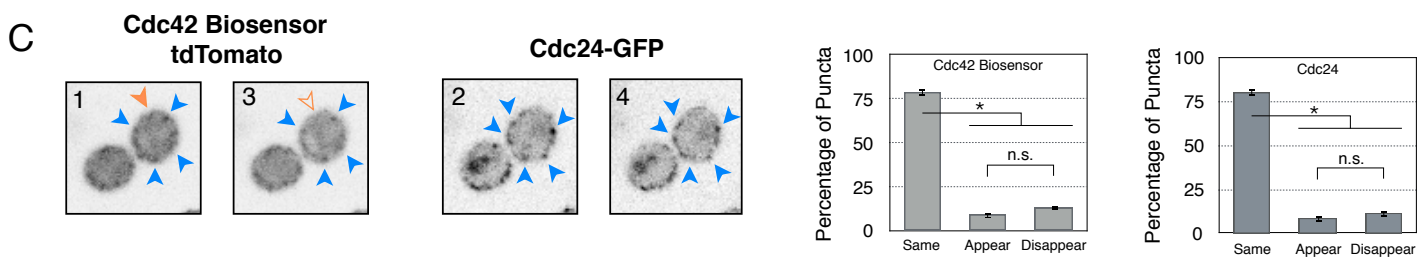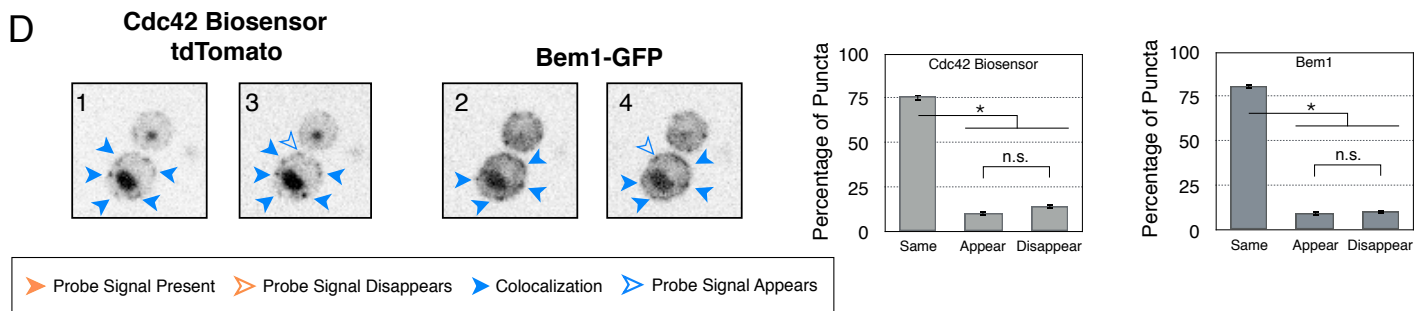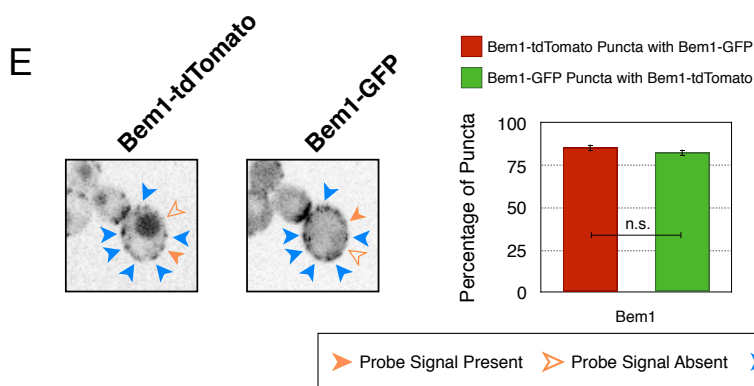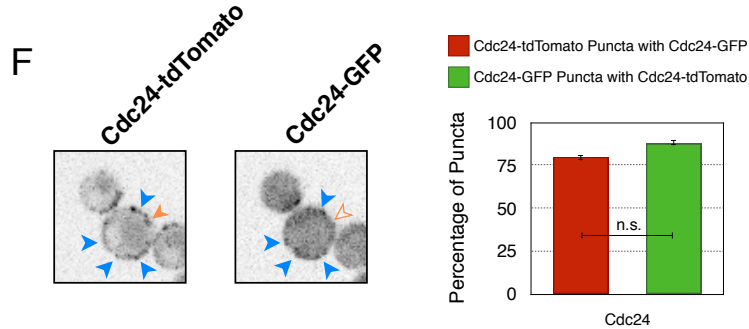

Supplement: supp [file elife-26722-supp-v1.zip › elife_poa_e26722_Figure_4_figure_supplement_2.pdf]
